# Supplementary material for: Transcriptomics of the grape berry shrivel ripening disorder
Source: PubMed Central journal article supplement (PMC6542784; doi:10.1007/s11103-019-00859-1), 2019-04-02

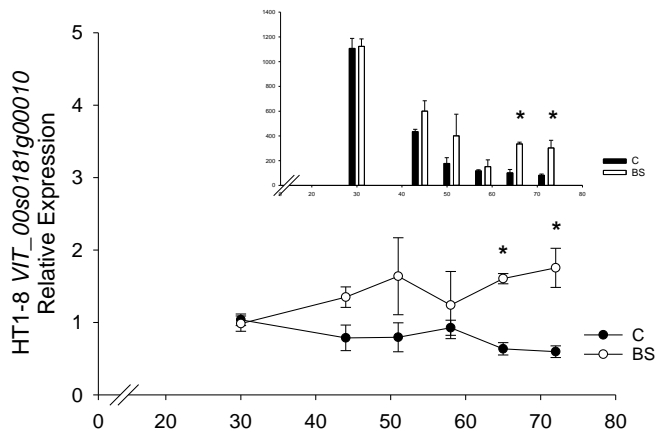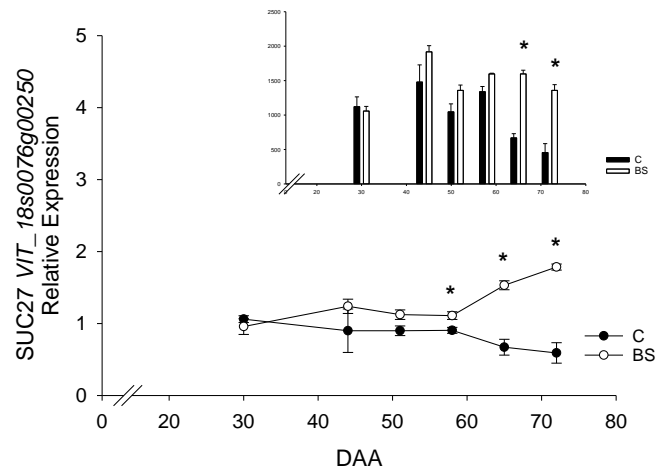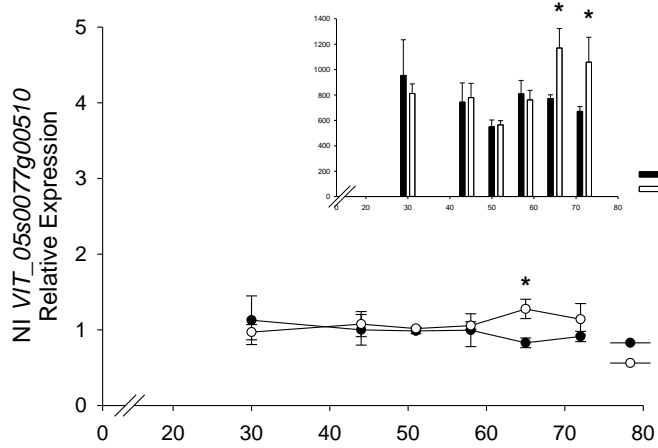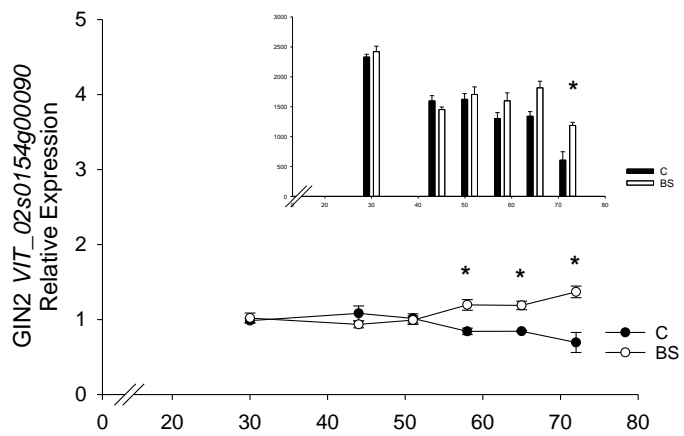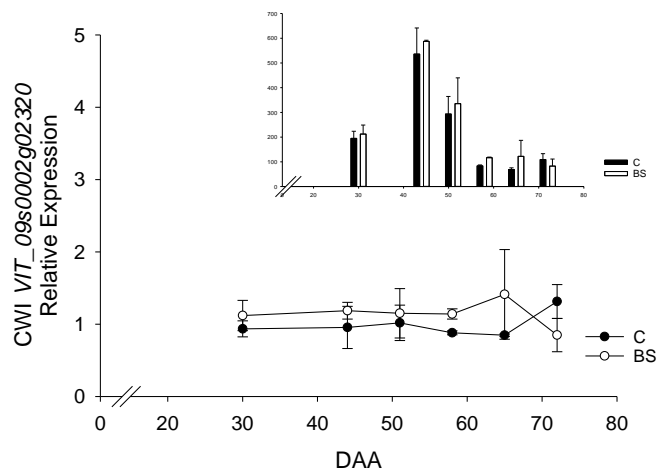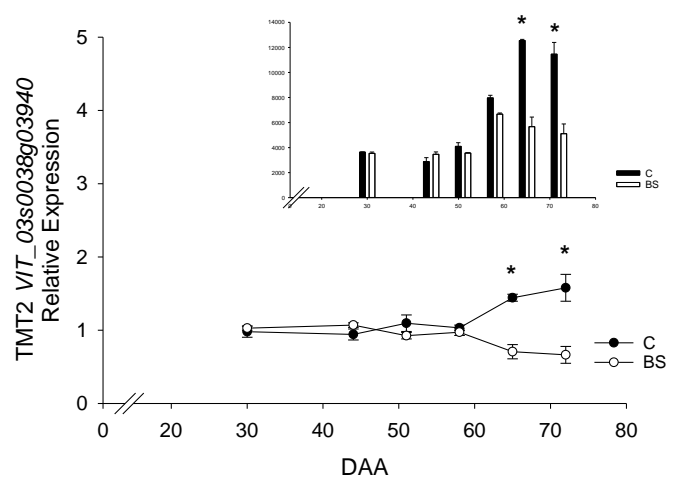

Supplement: 11103_2019_859_MOESM2_ESM.pdf [file 11103_2019_859_MOESM2_ESM.pdf]
